# Supplementary material for: Hexamer phasing governs transcription initiation in the 3′-leader of Ebola virus
Source: PubMed Central journal article supplement — RNA. 2020 Apr;26(4):439–53. doi: 10.1261/rna.073718.119 (PMC7075260; doi:10.1261/rna.073718.119), 2020-04
Supplement: supp_073718.119_Supplemental_Material.pdf [file supp_073718.119_Supplemental_Material.pdf]

## **Supplementary Material**

### **Hexamer phasing governs transcription initiation in the 3'-leader of Ebola virus**

Simone Bach<sup>1</sup>, Nadine Biedenkopf<sup>2</sup>, Arnold Grünweller<sup>1</sup>, Stephan Becker<sup>2</sup>, Roland K. Hartmann<sup>1,#</sup>

<sup>1</sup>Institut für Pharmazeutische Chemie, Philipps-Universität Marburg, Marbacher Weg 6, 35037 Marburg, Germany

<sup>2</sup>Institut für Virologie, Philipps-Universität Marburg, Hans-Meerwein-Str. 2, 35043 Marburg

Table S1: Primers used in this study for the construction of mutant minigenomes

| no.                                                                  | name                                            | Cloning strategy 1: site-directed mutagenesis / plasmid template                                                                                                  | primer fwd name | primer forward (5' to 3')                                                     | primer rev name | primer reverse (5' to 3')                                                               |
|----------------------------------------------------------------------|-------------------------------------------------|-------------------------------------------------------------------------------------------------------------------------------------------------------------------|-----------------|-------------------------------------------------------------------------------|-----------------|-----------------------------------------------------------------------------------------|
| <b>Overhang/inside-out primer insertion/substitution mutagenesis</b> |                                                 |                                                                                                                                                                   |                 |                                                                               |                 |                                                                                         |
| 1                                                                    | p3E5E_VP40                                      | mutagenesis of p3E5E_Rluc_RC                                                                                                                                      | pS_0006         | <b>CGAGGTAGGTTTTTCTTAATCTTCAT</b><br>CATAGTTATTTCGCACACAAAAGATC<br>C          | pS_0007         | <b>GCTGAGAGAGTGTTTTTTTCATTAACCTTCA</b><br>TTATATCGGAATTTAAATTTGAAATTG                   |
| 2                                                                    | p3E5E_GP                                        | mutagenesis of p3E5E_Rluc_RC                                                                                                                                      | pS_0016         | <b>CACCTGTCGGTTAATCTTCATCATA</b><br>GTTATTTCGCACACAAAAGATCC                   | pS_0017         | <b>AGCGTAATCTTCACTCATTGAAATTTATAT</b><br>CGGAATTTAAATTTGAAATTG                          |
| 3                                                                    | p3E5E_VP35                                      | mutagenesis of p3E5E_Rluc_RC                                                                                                                                      | pS_0002         | TAATCTTCAATCATGTTATTTCGCACA<br>CAAAAGATCC                                     | pS_0003         | <b>AAACCTTCACTCATTGAAATTTATATCG</b><br>GAATTTAAATTTGAAATTG                              |
| 4                                                                    | p3E5E_VP30                                      | mutagenesis of p3E5E_Rluc_RC                                                                                                                                      | pS_0008         | <b>AGATTACCTTTTTCTTAATCTTCATC</b><br>ATAGTTATTTCGCACACAAAAGATCC               | pS_0009         | <b>TTCGATTATCTTTAATCTTCACTCATT</b><br>GAAATTTATATCGGAATTTAAATTTGAAATTG                  |
| 5                                                                    | p3E5E_L                                         | mutagenesis of p3E5E_Rluc_RC                                                                                                                                      | pS_0012         | <b>CCAATAAGCAGTTTTCTTAATCTTC</b><br>CTCATAGTTATTTCGCACACAAAAGA<br>TCC         | pS_0013         | <b>GTCTTCCGTGTTTTAGATGAAGCAGTTG</b><br>AAATTTCTTCCTCATTGAAATTTATATCGGAATTTAAATTTGAAATTG |
| 6                                                                    | p3E5E_VP24                                      | mutagenesis of p3E5E_Rluc_RC                                                                                                                                      | pS_0010         | <b>GTTTATTCTTATCAGACCTCCGCAT</b><br>TAATCTTCAATCATGTTATTTCGCACA<br>CAAAAGATCC | pS_0011         | <b>CYTATTATTCAGATTAGGCCCAAGAGGC</b><br>ATTTCACTCATTGAAATTTATATCGGAATTTAAATTTGAAATTG     |
| 7                                                                    | p3E5E_VP35<br>+1 nt (stem)                      | mutagenesis of p3E5E_Rluc_RC                                                                                                                                      | pS_0002         | TAATCTTCAATCATGTTATTTCGCACA<br>CAAAAGATCC                                     | pS_0037         | <b>AAACCTTCACTCATTGAAATTTATATCG</b><br>GAATTTAAATTTGAAATTG                              |
| <b>Complementary primer mutagenesis</b>                              |                                                 |                                                                                                                                                                   |                 |                                                                               |                 |                                                                                         |
| 8                                                                    | p3E5E_GP-2<br>(loop)                            | deletion mutagenesis of p3E5E_GP                                                                                                                                  | pS_0098         | GAGATGAAGATTACGCTC-TGTCGG<br>CTTAATCTTCATCATAG                                | pS_0099         | CTATGATGAAGATTAAAGCCGACA-GAGCGTAATCTTCATCTC                                             |
| 9                                                                    | p3E5E_GP-2<br>(Δ2 nt PE1)                       | deletion mutagenesis of p3E5E_GP                                                                                                                                  | pS_0096         | CTGTCGGCTTAATCTTCATCA-GTTA<br>TTTCGCACACAAAAGATCC                             | pS_0097         | GGATCTTTTGTGTGCGAATAAC-TGATGAAGATTAAAGCCGAC<br>AG                                       |
| 10                                                                   | p3E5E_VP24<br>+2 (stem)                         | insertion mutagenesis of p3E5E_VP24                                                                                                                               | pS_0092         | CCGATATAAATTTCAATGATAGATGA<br>AGAATGCCTCTTGGGGCC                              | PS_0093         | GGCCCCAAGAGGCATCTTCATCTA<br>TTCATTGAAATTTATATCGG                                        |
| 11                                                                   | p3E5E_VP24<br>+2 (loop)                         | insertion mutagenesis of p3E5E_VP24                                                                                                                               | pS_0094         | GGGGCCTAATCTGAATAATAAGGGG<br>TTTATTCTTATCAGACCTCCGC                           | pS_0095         | GCGGAGGTCTGATAAGAATAAACCC<br>CTTATTATTTCAGATTAGGCCCC                                    |
| 12                                                                   | p3E5E_VP35<br>+1 (loop)                         | mutagenesis of p3E5E_VP35                                                                                                                                         | pS_0110         | CAATGAGATGAAGGTCTTTAATCTTC<br>ATCATAGTTATTTCGC                                | pS_0111         | GCGAATAACTATGATGAAGATTAAAG<br>ACCTTCATCTCATTG                                           |
| 13                                                                   | p3E5E_VP30<br>+4 (stem)                         | mutagenesis of p3E5E_VP30                                                                                                                                         | pS_0108         | CCGATATAAATTTCAATGAAACCGA<br>TGAAGATTAAAGATAATCG                              | pS_0109         | CGATTATCTTAAATCTTCATCGGTT<br>TTCATTGAAATTTATATCGG                                       |
| 14                                                                   | p3E5E_L+1<br>(stem)                             | mutagenesis of p3E5E_L                                                                                                                                            | PS_0102         | CCGATATAAATTTCAATGAGGAGGA<br>AGAATTTCAACTGCTTCATC                             | PS_0103         | GATGAAGCAGTTGAAATTTCTCTC<br>GTCATTGAAATTTATATCGG                                        |
| 15                                                                   | p3E5E_L+1<br>(loop)                             | mutagenesis of p3E5E_L                                                                                                                                            | PS_0104         | CAACTGCTTCATCTAAACACACGGA<br>AAGCCCAATAAGCAG                                  | PS_0105         | CTGCTATTGGGTCTTCCGTGTTT<br>TAGATGAAGCAGTTG                                              |
| 16                                                                   | p3E5E_NP<br>G <sub>72</sub>                     | substitution mutagenesis of p3E5E_Rluc_RC                                                                                                                         | pS_229          | CAATGAGAGGAAATTTAATCTTC<br>CTCATAGTTATTTCGC                                   | pS_230          | GCGAATAACTATGAGGAAGATTAAAT<br>ATCTTCCTCATTG                                             |
| 17                                                                   | p3E5E_NP-1<br>(stem)                            | deletion mutagenesis of p3E5E_Rluc_RC                                                                                                                             | pS_231          | CCGATATAAATTTCAATG-GAGGA<br>AAATTTAATCTTCCTC                                  | pS_232          | GAGGAAGATTAAATAATTTCTC<br>CTCATTGAAATTTATATCGG                                          |
| 18                                                                   | p3E5E_NP-1<br>(loop)                            | deletion mutagenesis of p3E5E_Rluc_RC                                                                                                                             | pS_233          | CAATGAGAGGAAAAAT-ATTAAT<br>CTTCCTCATAGTTATTTCGCAC                             | pS_234          | GTGCGAATAACTATGAGGAAGATTAA<br>AT-ATTTCTCCTCATTG                                         |
| 19                                                                   | p3E5E_NP+1<br>(stem)                            | insertion mutagenesis of p3E5E_Rluc_RC                                                                                                                            | pS_235          | CCGATATAAATTTCAATGAAAGGGA<br>AAATTTAATCTTCCTC                                 | pS_236          | GAGGAAGATTAAATAATTTCTC<br>CTCATTGAAATTTATATCGG                                          |
| 20                                                                   | p3E5E_NP+1<br>(loop)                            | insertion mutagenesis of p3E5E_Rluc_RC                                                                                                                            | pS_237          | CAATGAGAGGAAAAATATTAATCTT<br>CCTCATAGTTATTTCGCAC                              | pS_238          | GTGCGAATAACTATGAGGAAGATTAA<br>TATATTTCTCCTCATTG                                         |
| 21                                                                   | RD_p3E5E_NP-1<br>(stem)                         | deletion mutagenesis of p3E5E_Rluc_RD                                                                                                                             | pS_231          | CCGATATAAATTTCAATG-GAGGA<br>AAATTTAATCTTCCTC                                  | pS_232          | GAGGAAGATTAAATAATTTCTC<br>CTCATTGAAATTTATATCGG                                          |
| 22                                                                   | RD_p3E5E_NP-1<br>(loop)                         | deletion mutagenesis of p3E5E_Rluc_RD                                                                                                                             | pS_233          | CAATGAGAGGAAAAAT-ATTAATCTT<br>CCTCATAGTTATTTCGCAC                             | pS_234          | GTGCGAATAACTATGAGGAAGATTAA<br>T-ATTTCTCCTCATTG                                          |
| 23                                                                   | RD_p3E5E_NP+1<br>(stem)                         | insertion mutagenesis of p3E5E_Rluc_RD                                                                                                                            | pS_235          | CCGATATAAATTTCAATGAAAGGGA<br>AAATTTAATCTTCCTC                                 | pS_236          | GAGGAAGATTAAATAATTTCTC<br>CTCATTGAAATTTATATCGG                                          |
| 24                                                                   | RD_p3E5E_NP+1<br>(loop)                         | insertion mutagenesis of p3E5E_Rluc_RD                                                                                                                            | pS_237          | CAATGAGAGGAAAAATATTAATCTT<br>CCTCATAGTTATTTCGCAC                              | pS_238          | GTGCGAATAACTATGAGGAAGATTAA<br>TATATTTCTCCTCATTG                                         |
| 25                                                                   | p3E5E_NP<br>U <sub>75</sub>                     | substitution mutagenesis of p3E5E_Rluc_RC                                                                                                                         | pS_252          | CCGATATAAATTTCAATGAGAGTAAA<br>ATTATTAATCTTCCTCATAG                            | pS_253          | CTATGAGGAAGATTAAATAATTTT<br>ACTCTCATTGAAATTTATATCGG                                     |
| 26                                                                   | p3E5E_NP<br>U <sub>75</sub> /G <sub>72</sub>    | substitution mutagenesis of p3E5E_NP stab.                                                                                                                        | pS_250          | CCGATATAAATTTCAATGAGAGTAA<br>GATTTAATCTTCCTCATAG                              | pS_251          | CTATGAGGAAGATTAAATAATCTT<br>ACTCTCATTGAAATTTATATCGG                                     |
| 27                                                                   | RD_p3E5E_NP<br>U <sub>75</sub>                  | substitution mutagenesis of p3E5E_Rluc_RD                                                                                                                         | pS_252          | CCGATATAAATTTCAATGAGAGTAAA<br>ATTATTAATCTTCCTCATAG                            | pS_253          | CTATGAGGAAGATTAAATAATTTT<br>ACTCTCATTGAAATTTATATCGG                                     |
| 28                                                                   | RD_p3E5E_NP<br>U <sub>75</sub> /G <sub>72</sub> | substitution mutagenesis of p3E5E_Rluc_RD                                                                                                                         | pS_250          | CCGATATAAATTTCAATGAGAGTAA<br>GATTTAATCTTCCTCATAG                              | pS_251          | CTATGAGGAAGATTAAATAATCTT<br>ACTCTCATTGAAATTTATATCGG                                     |
| <b>Inside-out primer deletion mutagenesis</b>                        |                                                 |                                                                                                                                                                   |                 |                                                                               |                 |                                                                                         |
| 29                                                                   | RD_p3E5E_VP30                                   | mutagenesis of p3E5E_VP30                                                                                                                                         | pS_0029         | TTTCCAGGAATCCTTTTTGCAACG                                                      | pS_0030         | ACTATAGTGAGTCGATTAACCCGGGATCG                                                           |
| 30                                                                   | RD_p3E5E_VP40                                   | mutagenesis of p3E5E_VP40                                                                                                                                         | pS_0029         | TTTCCAGGAATCCTTTTTGCAACG                                                      | pS_0030         | ACTATAGTGAGTCGATTAACCCGGGATCG                                                           |
| 31                                                                   | RD_p3E5E_VP35                                   | mutagenesis of p3E5E_VP35                                                                                                                                         | pS_0029         | TTTCCAGGAATCCTTTTTGCAACG                                                      | pS_0030         | ACTATAGTGAGTCGATTAACCCGGGATCG                                                           |
| 32                                                                   | RD_p3E5E_GP                                     | mutagenesis of p3E5E_GP                                                                                                                                           | pS_0029         | TTTCCAGGAATCCTTTTTGCAACG                                                      | pS_0030         | ACTATAGTGAGTCGATTAACCCGGGATCG                                                           |
| 33                                                                   | RD_p3E5E_VP35+1<br>(stem)                       | mutagenesis of p3E5E_VP35+1 (stem)                                                                                                                                | pS_0029         | TTTCCAGGAATCCTTTTTGCAACG                                                      | pS_0030         | ACTATAGTGAGTCGATTAACCCGGGATCG                                                           |
| no.                                                                  | name                                            | Cloning strategy 2: restriction cloning                                                                                                                           | primer fwd name | primer fwd (5' to 3')                                                         | primer rev name | primer rev (5' to 3')                                                                   |
|                                                                      |                                                 | 1) PCR with respective replication-competent plasmid ( no. 8, 9, 12, 13) as template<br><br>2) restriction cloning with BamHI and BstBI into vector p3E5E_Rluc_RD |                 |                                                                               |                 |                                                                                         |

|    |                                          |  |      |                                |      |                           |
|----|------------------------------------------|--|------|--------------------------------|------|---------------------------|
| 34 | RD_p3E5E<br>GP-2 (loop)                  |  | pS_1 | CTTTCGAAGTCATGGTGGTATGAGA<br>C | pS_2 | GTTAGCAGCCGGATCCTTTTTTTTG |
| 35 | RD_p3E5E<br>GP-2 ( $\Delta$ 2 nt<br>PE1) |  | pS_1 | CTTTCGAAGTCATGGTGGTATGAGA<br>C | pS_2 | GTTAGCAGCCGGATCCTTTTTTTTG |
| 36 | RD_VP35+1<br>(loop)                      |  | pS_1 | CTTTCGAAGTCATGGTGGTATGAGA<br>C | pS_2 | GTTAGCAGCCGGATCCTTTTTTTTG |
| 37 | RD_VP30+4<br>(stem)                      |  | pS_1 | CTTTCGAAGTCATGGTGGTATGAGA<br>C | pS_2 | GTTAGCAGCCGGATCCTTTTTTTTG |

The different PCR-based strategies for site-directed mutagenesis are illustrated in Fig. S2 (except for the classical restriction cloning). The EBOV wt minigenome pANDY 3E5E is termed p3E5E\_Rluc\_RC; RC indicates the replication-competent and RD replication-deficient minigenomes. Hyphens in primer sequences mark nucleotide deletions, boldface underlined nucleotides substitutions or insertions.

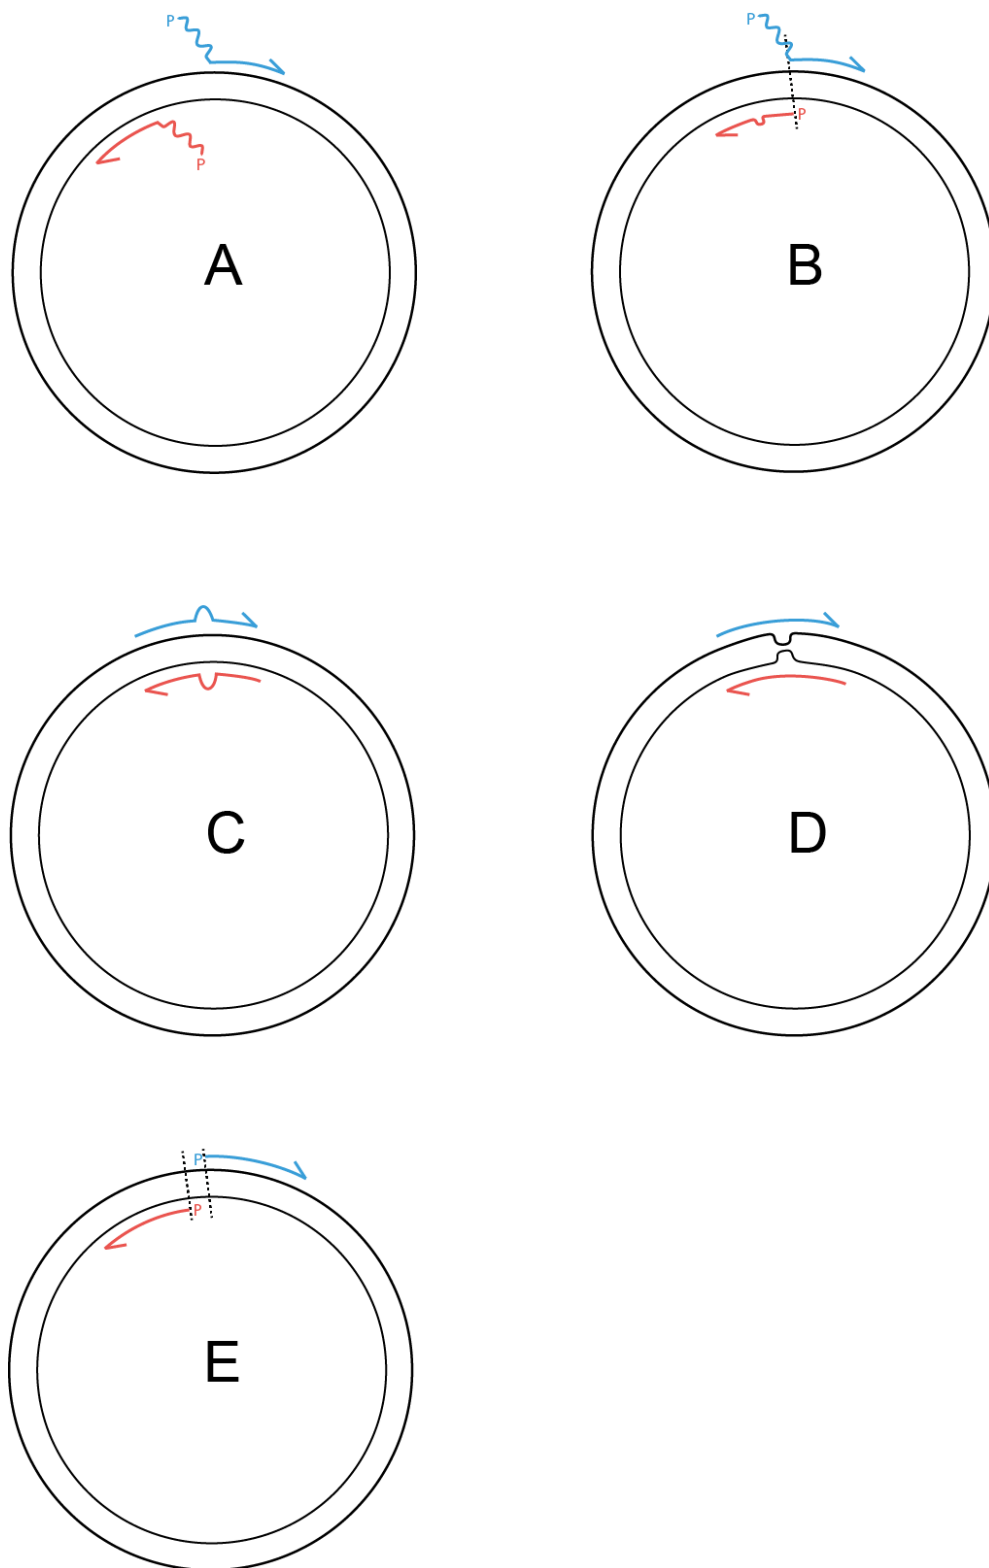

**Fig. S1:** PCR-based strategies (essentially performed as previously described, Li et al., 2009) that were used for the construction of mutant minigenomes. **(A, B)** Overhang/inside-out primer insertion/substitution mutagenesis. **(C, D)** Complementary primer mutagenesis; insertions and substitutions were introduced according to scheme C and deletions according to scheme D. **(E)** Inside-out primer deletion mutagenesis. For more information, see also the NEB web site for the Q5 Site-Directed Mutagenesis Kit (<https://www.neb-online.de/en/pcr-and-dna-amplification/q5-site-directed-mutagenesis-kit/>). In approaches A, B and E, the

entire plasmid is amplified with 5'-phosphorylated primers that introduce the desired mutations/substitutions/insertions/deletions, followed by circularization of PCR products and template removal by Dpn I treatment before bacterial transformation. In approaches C and D, phosphorylation of 5'-ends and ligation are carried out by bacterial enzymes after DNA transformation.

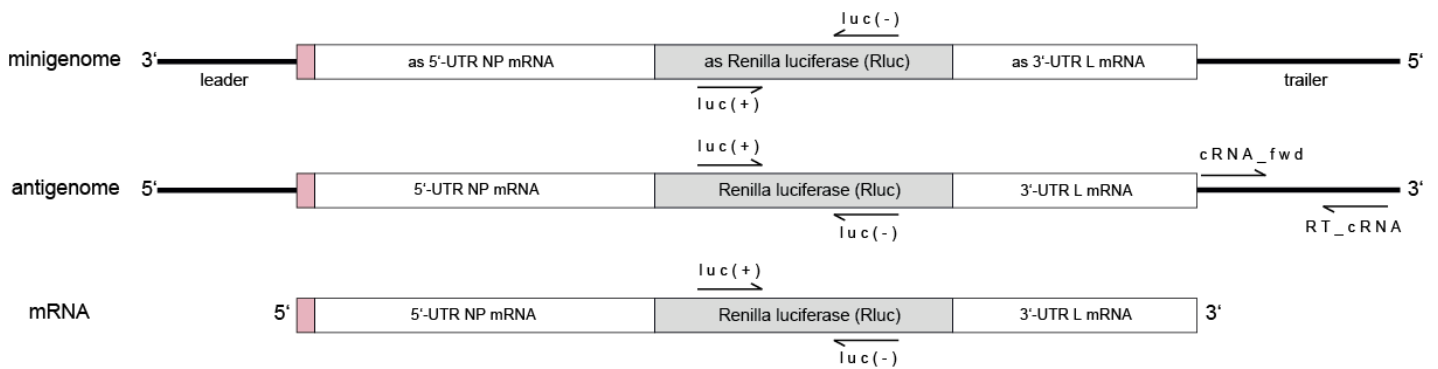

**Fig. S2:** Schematic representation of primers used for qRT-PCR of viral RNA species; as, antisense. See Fig. 2A of the main text for the color code.

**Reference**

Li D, Willkomm DK, Hartmann RK. 2009. Minor changes largely restore catalytic activity of archaeal RNase P RNA from *Methanothermobacter thermoautotrophicus*. *Nucleic Acids Res* **37**:231-242.
